# Supplementary material for: High-energy proton irradiation damage on two-dimensional hexagonal boron nitride
Source: Royal Society of Chemistry journal article supplement (doi:10.1039/c9ra03121a), 2019-01-01
Supplement: c9ra03121a1.pdf [file c9ra03121a1.pdf]

## Supporting Information

### High-energy proton irradiation damage on two-dimensional hexagonal boron nitride

Dongryul Lee<sup>1</sup>†, Sanghyuk Yoo<sup>2</sup>†, Jinho Bae<sup>1</sup>, Hyunik Park<sup>1</sup>, Keonwook Kang<sup>2,\*</sup>, and Jihyun Kim<sup>1,\*</sup>

<sup>1</sup>Department of Chemical and Biological Engineering, Korea University, Seoul 02841, South Korea

<sup>2</sup>Department of Mechanical Engineering, Yonsei University, Seoul 03722, South Korea

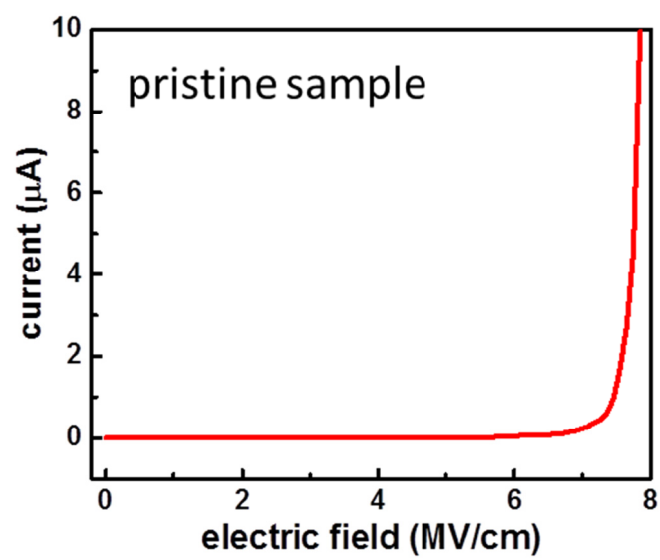

**Figure S1** current-voltage characteristics of the pristine h-BN nanocapacitor
